# Supplementary material for: Guided ion beam and theoretical studies of the reaction of Ru+ with CS2 in the gas-phase: thermochemistry of RuC+, RuS+, and RuCS+
Source: Royal Society of Chemistry journal article supplement (doi:10.1039/b926429a), 2010-01-01
Supplement: b926429a.pdf [file b926429a.pdf]

**Supplementary Information for**  
**Guided Ion Beam and Theoretical Studies of the Reaction of Ru<sup>+</sup> with CS<sub>2</sub> in the Gas-phase: Thermochemistry of RuC<sup>+</sup>, RuS<sup>+</sup>, and RuCS<sup>+</sup>**

By P. B. Armentrout and Ilona Kretzschmar

**Figure S1.** Doublet spin intermediates, transition states, and products calculated at the B3LYP/Def2TZVPP level of theory in the order of the reaction coordinate diagram of Figure 1. Bond lengths are shown in Å. All species are planar. Atoms are color coded as ruthenium – blue, carbon – grey, and sulfur – yellow.

**Figure S2.** Reaction coordinate diagram for reaction of Ru<sup>+</sup> in quartet (blue line) , sextet (red line), and doublet (light green – A', dark green – A'') states with CS<sub>2</sub> for dissociation of the SRu<sup>+</sup>(CS) intermediates into the products of reactions 1 – 3 along the path where the RuS bond is broken first. All energies are calculated at the CCSD(T)//B3LYP level including zero point energies. The large dot indicates a crossing point between the quartet and sextet surfaces.

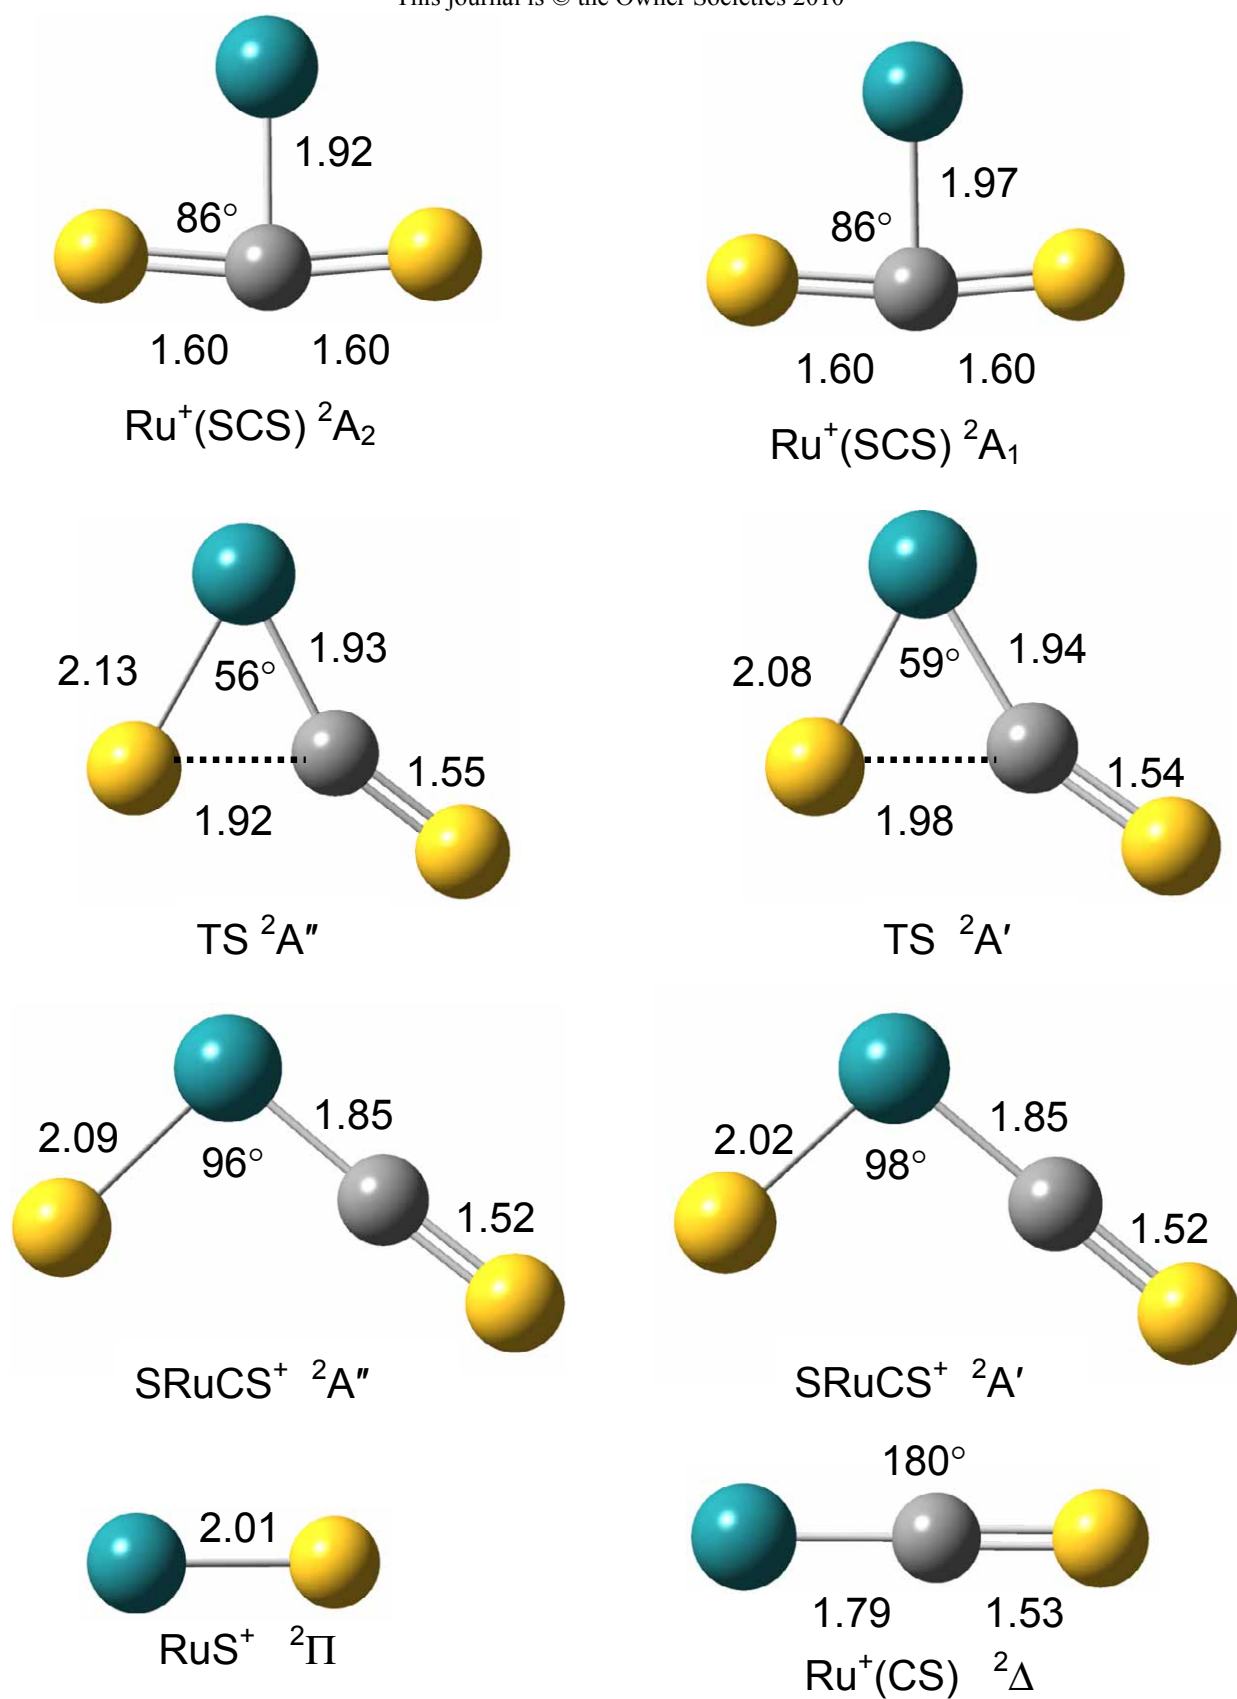

Figure S1

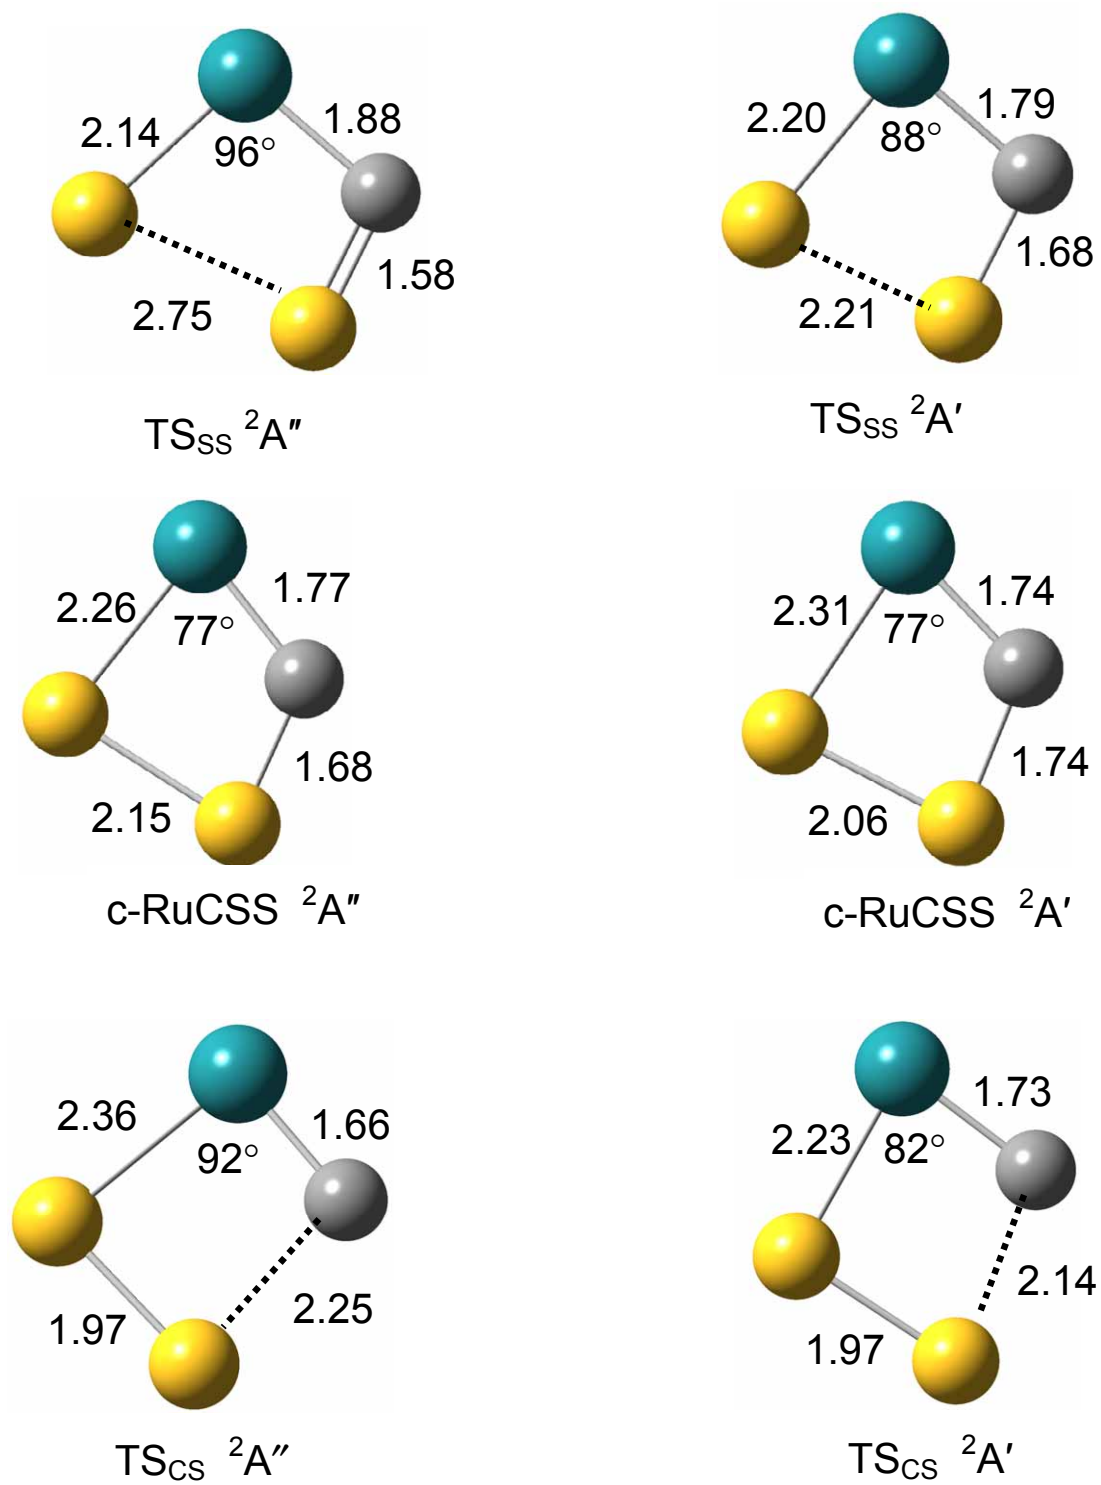

Figure S1

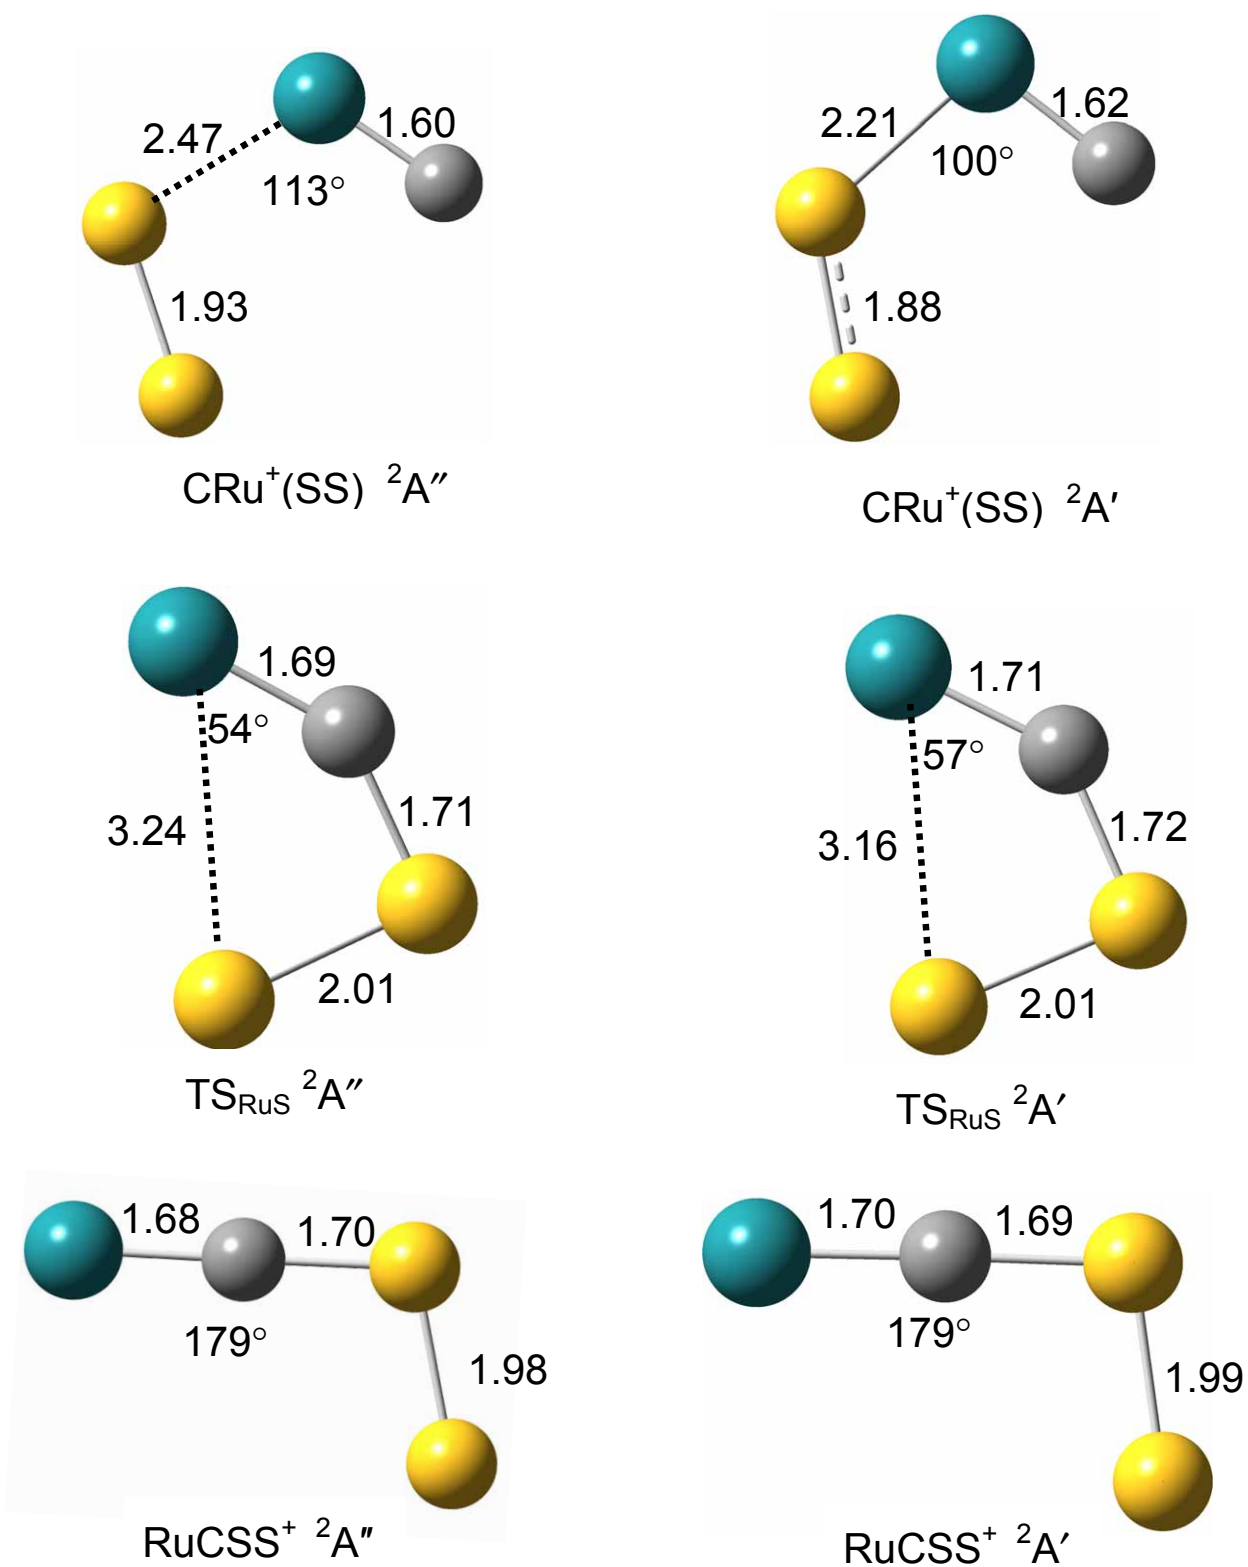

Figure S1

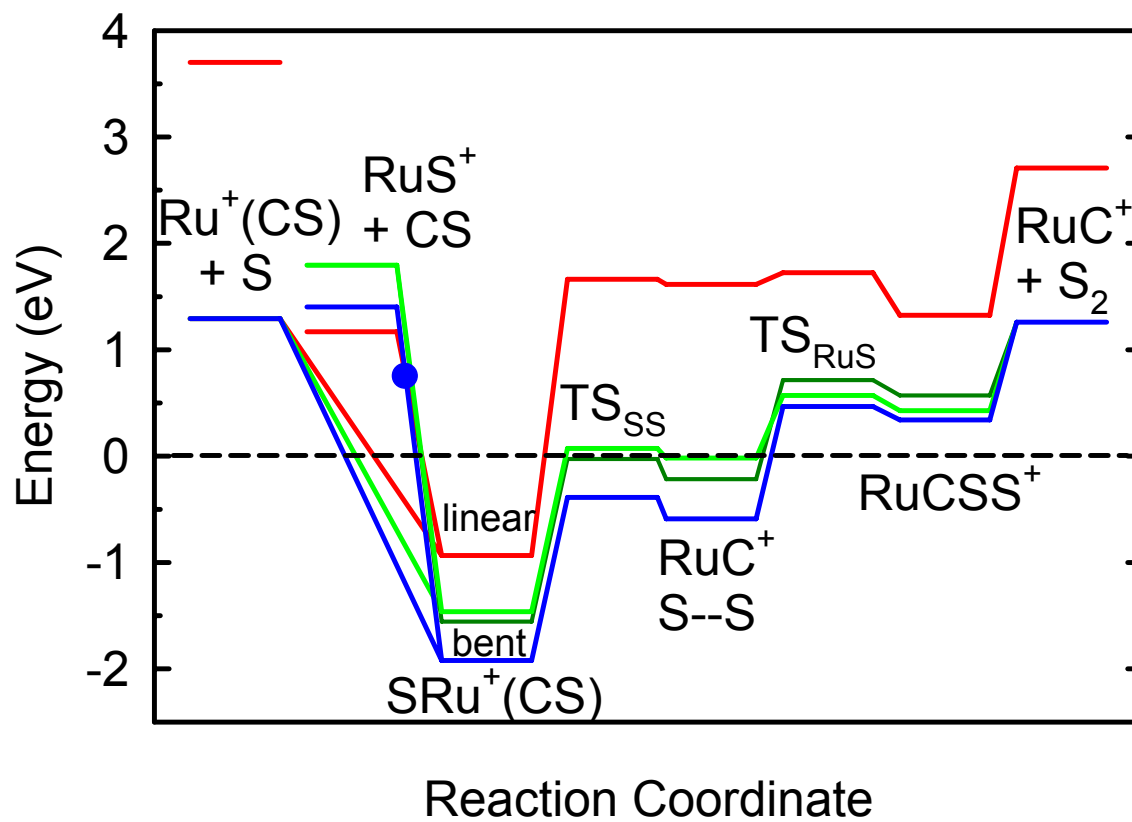

Figure S2

**TABLE S1: Geometric Parameters, Vibrational Frequencies, and Relative Energies for Reactants, Products, Intermediates, and Transition States for Reaction of Ru<sup>+</sup> with CS<sub>2</sub><sup>a</sup>**

| species                           | state                        | $r(\text{Ru-S})$<br>Å | $r(\text{Ru-C})$<br>Å | $r(\text{C-S}), \text{Å}$<br>$r(\text{S-S}), \text{Å}$ | $\angle \text{RuSC}, ^\circ$<br>$\angle \text{SRuC}, ^\circ$<br>$\angle \text{CSS}, ^\circ$ | $\angle \text{SCS}, ^\circ$<br>$\angle \text{RuCS}, ^\circ$<br>$\angle \text{RuSS}, ^\circ$ | $\nu$<br>$\text{cm}^{-1}$         | $E_{\text{rel}}^{\text{b}}$<br>eV |
|-----------------------------------|------------------------------|-----------------------|-----------------------|--------------------------------------------------------|---------------------------------------------------------------------------------------------|---------------------------------------------------------------------------------------------|-----------------------------------|-----------------------------------|
| Ru <sup>+</sup> + CS <sub>2</sub> | <sup>4</sup> F               |                       |                       | 1.553 (2) <sup>c</sup>                                 |                                                                                             | 180.0 <sup>d</sup>                                                                          | 408 (2), 678,<br>1561             | 0.000<br>(0.000)                  |
| Ru <sup>+</sup> (SCS)             | <sup>4</sup> B <sub>1</sub>  | 2.554 (2)             | 2.020                 | 1.594 (2) <sup>c</sup>                                 | 52.3 (2) <sup>d</sup>                                                                       | 178.2 <sup>d</sup>                                                                          | 104, 200, 493,<br>533, 629, 1356  | -1.932<br>(-1.902)                |
|                                   | <sup>2</sup> A <sub>1</sub>  | 2.440 (2)             | 1.966                 | 1.595 (2) <sup>c</sup>                                 | 53.5 (2) <sup>d</sup>                                                                       | 171.7 <sup>d</sup>                                                                          | 237, 245, 385,<br>476, 675, 1380  | -1.473<br>(-1.441)                |
|                                   | <sup>2</sup> A <sub>2</sub>  | 2.408 (2)             | 1.923                 | 1.598 (2) <sup>c</sup>                                 | 52.8 (2) <sup>d</sup>                                                                       | 171.5 <sup>d</sup>                                                                          | 195, 237, 259,<br>487, 688, 1375  | -1.244<br>(-1.258)                |
|                                   | <sup>2</sup> A <sub>1</sub>  | 2.518 (2)             | 1.992                 | 1.596 (2) <sup>c</sup>                                 | 52.3 (2) <sup>d</sup>                                                                       | 176.8 <sup>d</sup>                                                                          | 162, 201, 356,<br>525, 540, 1368  | -1.205<br>(-1.178)                |
|                                   | <sup>2</sup> B <sub>2</sub>  | 2.670 (2)             | 2.141                 | 1.580 (2) <sup>c</sup>                                 | 72.6 <sup>d</sup>                                                                           | 179.1 <sup>d</sup>                                                                          | 57, 157, 382,<br>422, 631, 1425   | -0.348<br>(-0.551)                |
|                                   | <sup>6</sup> A' <sub>a</sub> | 2.366 (2)             | 2.084                 | 1.690 (2) <sup>c</sup>                                 | 59.1 (2) <sup>d</sup>                                                                       | 136.3 <sup>d</sup>                                                                          | 212, 242, 316,<br>357, 668, 977   | 0.073<br>(0.007)                  |
|                                   | <sup>6</sup> A' <sub>b</sub> | 2.467                 | 2.099                 | 1.607 <sup>c</sup><br>1.684 <sup>c</sup>               | 57.1 <sup>d</sup>                                                                           | 133.4 <sup>d</sup>                                                                          | 119, 213, 259,<br>333, 674, 1021  | 0.731<br>(0.162)                  |
|                                   | <sup>4</sup> B <sub>2</sub>  | 2.989 (2)             | 1.983                 | 1.647 (2) <sup>c</sup>                                 | 38.4 (2) <sup>d</sup>                                                                       | 139.0 <sup>d</sup>                                                                          | -79, 16, 177,<br>459, 763, 834    | 0.767<br>(0.559)                  |
| SRuCS <sup>+</sup><br>(TS)        | <sup>4</sup> A''             | 2.126                 | 1.932                 | 1.539, <sup>c</sup><br>2.001 <sup>c</sup>              | 55.7, <sup>d</sup><br>58.9 <sup>e</sup>                                                     | 137.0, <sup>d</sup><br>157.6 <sup>e</sup>                                                   | -338, 195, 314,<br>391, 503, 1303 | -1.304<br>(-1.311)                |
|                                   | <sup>2</sup> A''             | 2.129                 | 1.931                 | 1.546, <sup>c</sup><br>1.925 <sup>c</sup>              | 56.6, <sup>d</sup><br>56.4 <sup>e</sup>                                                     | 138.0, <sup>d</sup><br>155.0 <sup>e</sup>                                                   | -312, 184, 321,<br>396, 503, 1276 | -0.632<br>(-0.839)                |
|                                   | <sup>2</sup> A'              | 2.078                 | 1.936                 | 1.540, <sup>c</sup><br>1.981 <sup>c</sup>              | 56.9, <sup>d</sup><br>59.0 <sup>e</sup>                                                     | 139.8, <sup>d</sup><br>156.1 <sup>e</sup>                                                   | -357, 193, 304,<br>388, 512, 1289 | -0.571<br>(-0.643)                |
|                                   | <sup>6</sup> A               | 2.228                 | 2.111                 | 1.543, <sup>c</sup><br>2.127 <sup>c</sup>              | 57.9, <sup>d</sup><br>58.6 <sup>e</sup>                                                     | 117.9, <sup>d</sup><br>178.7 <sup>e</sup>                                                   | -407, 141, 158,<br>234, 380, 1221 | 0.636<br>(0.535)                  |

Supplementary Material (ESI) for PCCP  
This journal is © the Owner Societies 2010

|                       |                                       |       |                    |                                           |                                         |                                                           |                                                          |
|-----------------------|---------------------------------------|-------|--------------------|-------------------------------------------|-----------------------------------------|-----------------------------------------------------------|----------------------------------------------------------|
| SRu <sup>+</sup> (CS) | <sup>4</sup> A'                       | 2.327 | 1.995              | 1.557, <sup>c</sup><br>2.011 <sup>c</sup> | 54.2, <sup>d</sup><br>54.8 <sup>e</sup> | 125.4, <sup>d</sup><br>163.6 <sup>e</sup>                 | -379, 156, 261, 1.070<br>306, 350, 1174 (1.008)          |
|                       | <sup>4</sup> A''                      | 2.083 | 1.862              | 1.516 <sup>c</sup>                        | 95.1 <sup>e</sup>                       | 176.9 <sup>e</sup>                                        | 102, 295, 345, -1.921<br>416, 503, 1406 (-1.939)         |
|                       | <sup>2</sup> A''                      | 2.090 | 1.848              | 1.518 <sup>c</sup>                        | 95.8 <sup>e</sup>                       | 177.7 <sup>e</sup>                                        | 104, 298, 349, -1.642<br>422, 488, 1402 -1.555           |
|                       | <sup>2</sup> A'                       | 2.015 | 1.853              | 1.518 <sup>c</sup>                        | 97.5 <sup>e</sup>                       | 179.3 <sup>e</sup>                                        | 106, 249, 302, -1.450<br>402, 559, 1397 (-1.462)         |
|                       | <sup>6</sup> Σ <sup>+</sup>           | 2.196 | 2.093              | 1.506 <sup>c</sup>                        | 180.0 <sup>e</sup>                      | 180.0 <sup>e</sup>                                        | 69 (2), 252, 290 -0.934<br>(2), 379, 1412 (-0.769)       |
|                       | <sup>6</sup> A'                       | 2.170 | 2.116              | 1.506 <sup>c</sup>                        | 156 <sup>e</sup>                        | 173 <sup>e</sup>                                          | -34, 190, 252, -0.792<br>268, 406, 1404 (-0.649)         |
|                       | CP1<br><sup>4</sup> A''               | 2.091 | 2.140              | 1.504 <sup>c</sup>                        | 163 <sup>e</sup>                        | 178 <sup>e</sup>                                          | -107, 84, 158, -0.641<br>257, 433, 1416 (-0.646)         |
|                       | CP1<br><sup>4</sup> A'                | 2.105 | 2.033              | 1.511 <sup>c</sup>                        | 126.4 <sup>e</sup>                      | 167.9 <sup>e</sup>                                        | 45, 236, 240, -0.547<br>290, 408, 1370 (-0.593)          |
|                       | <sup>4</sup> Φ<br>( <sup>4</sup> A'') | 2.102 | 2.184              | 1.502 <sup>c</sup>                        | 180.0 <sup>e</sup>                      | 180.0 <sup>e</sup>                                        | -126, 27, 155, -0.589<br>234, 240, 417, (-0.559)<br>1429 |
|                       | <sup>4</sup> Δ                        | 2.122 | 2.100              | 1.509 <sup>c</sup>                        | 180.0 <sup>e</sup>                      | 180.0 <sup>e</sup>                                        | 93(2), 239, 433, -0.198<br>1075 (2), 1390 (-0.276)       |
| <sup>2</sup> Δ        | 2.028                                 | 2.189 | 1.504 <sup>c</sup> | 180.0 <sup>e</sup>                        | 180.0 <sup>e</sup>                      | -161, -105, 151, -0.208<br>195, 229, 554, (0.206)<br>1415 |                                                          |
| TS <sub>SS</sub>      | <sup>4</sup> A''<br>CP2               | 2.056 | 3.262              | 1.509 <sup>c</sup>                        | 155 <sup>e</sup>                        | 178 <sup>e</sup>                                          | -82, -68, 24, 0.412<br>153, 457, 1390 (0.485)            |
|                       | <sup>4</sup> A''                      | 2.191 | 1.804              | 1.599 <sup>c</sup><br>2.463 <sup>f</sup>  | 76.1 <sup>e</sup>                       | 129.5 <sup>e</sup>                                        | -336, 228, 304, -0.387<br>392, 652, 1009 (-0.345)        |
|                       | <sup>2</sup> A''                      | 2.136 | 1.878              | 1.584, <sup>c</sup><br>2.748 <sup>f</sup> | 96.0 <sup>e</sup>                       | 104.8 <sup>e</sup>                                        | -200, -55, 205, -0.027<br>430, 556, 1011 (0.280)         |
|                       | <sup>2</sup> A'                       | 2.196 | 1.786              | 1.683 <sup>c</sup><br>2.208 <sup>f</sup>  | 88.4 <sup>e</sup>                       | 104.1 <sup>e</sup>                                        | -193, 113, 261, 0.074<br>370, 659, 764 (0.093)           |

|                       |                               |           |       |                                           |                                          |                                         |                                                  |
|-----------------------|-------------------------------|-----------|-------|-------------------------------------------|------------------------------------------|-----------------------------------------|--------------------------------------------------|
| c-RuCSS <sup>+</sup>  | <sup>6</sup> A                | 2.262     | 1.890 | 1.692, <sup>c</sup><br>2.239 <sup>f</sup> | 79.3 <sup>e</sup>                        | 105.0 <sup>e</sup>                      | -373, 175, 268, 1.663<br>305, 608, 755 (1.677)   |
|                       | <sup>4</sup> A''              | 2.280     | 1.780 | 1.674 <sup>c</sup><br>2.139 <sup>f</sup>  | 77.7 <sup>e</sup>                        | 115.5 <sup>e</sup>                      | 212, 224, 309, -0.590<br>407, 721, 848 (-0.502)  |
|                       | <sup>2</sup> A''              | 2.256     | 1.772 | 1.679 <sup>c</sup><br>2.146 <sup>f</sup>  | 76.8 <sup>e</sup>                        | 117.3 <sup>e</sup>                      | 228, 254, 303, -0.216<br>405, 730, 842 (-0.161)  |
| TS <sub>CS</sub>      | <sup>2</sup> A'               | 2.307     | 1.738 | 1.742 <sup>c</sup><br>2.062 <sup>f</sup>  | 77.4 <sup>e</sup>                        | 114.3 <sup>e</sup>                      | 208, 226, 229, -0.017<br>450, 674, 877 (0.051)   |
|                       | <sup>6</sup> A                | 2.302     | 1.872 | 1.754 <sup>c</sup><br>2.098 <sup>f</sup>  | 78.2 <sup>e</sup>                        | 105.3 <sup>e</sup>                      | 113, 221, 259, 1.615<br>427, 548, 727 (1.668)    |
|                       | <sup>6</sup> A''              | 2.331     | 1.862 | 1.774 <sup>c</sup><br>2.067 <sup>f</sup>  | 77.6 <sup>e</sup>                        | 110.2 <sup>e</sup>                      | -97, 182, 247, 1.703<br>477, 621, 741 (1.685)    |
| CRu <sup>+</sup> (SS) | <sup>2</sup> A'               | 2.229     | 1.727 | 2.144 <sup>c</sup><br>1.967 <sup>f</sup>  | 82.4 <sup>e</sup><br>79.5 <sup>g</sup>   | 104.4 <sup>e</sup><br>93.8 <sup>g</sup> | -352, 190, 277, 0.124<br>330, 581, 798 (0.368)   |
|                       | <sup>4</sup> A''              | 2.396     | 1.646 | 2.417 <sup>c</sup><br>1.968 <sup>f</sup>  | 94.6 <sup>e</sup><br>86.2 <sup>g</sup>   | 93.1 <sup>e</sup><br>86.2 <sup>g</sup>  | -269, 89, 208, 0.211<br>266, 598, 971 (0.250)    |
|                       | <sup>2</sup> A''              | 2.360     | 1.660 | 2.254 <sup>c</sup><br>1.975 <sup>f</sup>  | 92.3 <sup>e</sup><br>87.8 <sup>g</sup>   | 84.4 <sup>e</sup><br>95.5 <sup>g</sup>  | -370, -10, 214, 0.374<br>284, 585, 949 (0.418)   |
| CRu <sup>+</sup> (SS) | <sup>6</sup> A'               | 2.550     | 1.763 | 2.228 <sup>c</sup><br>2.017 <sup>f</sup>  | 103.8 <sup>e</sup><br>107.7 <sup>g</sup> | 80.3 <sup>e</sup><br>68.2 <sup>g</sup>  | -355, 130, 137, 1.953<br>227, 555, 770 (2.115)   |
|                       | <sup>4</sup> A'               | 2.455 (2) | 1.614 | 1.978 <sup>f</sup>                        | 112.6 (2) <sup>e</sup>                   | 66.3 (2) <sup>g</sup>                   | 134, 183, 225, -0.367<br>239, 615, 1101 (-0.307) |
|                       | <sup>2</sup> A'               | 2.214     | 1.618 | 1.882 <sup>f</sup>                        | 100.3 <sup>e</sup>                       | 121.4 <sup>g</sup>                      | 118, 127, 270, -0.013<br>308, 701, 1079 (-0.099) |
| CRu <sup>+</sup> (SS) | <sup>4</sup> A''              | 2.467     | 1.602 | 1.928 <sup>f</sup>                        | 113.2 <sup>e</sup>                       | 104.9 <sup>g</sup>                      | -14, 78, 149, 0.012<br>232, 649, 1131 (0.036)    |
|                       | <sup>2</sup> A'' <sub>a</sub> | 2.337     | 1.603 | 1.906 <sup>f</sup>                        | 105.9 <sup>e</sup>                       | 120.0 <sup>g</sup>                      | -37, 100, 219, 0.122<br>245, 671, 1127 (-0.003)  |
|                       | <sup>2</sup> A                | 2.268     | 1.614 | 1.891 <sup>f</sup>                        | 101.6 <sup>e</sup>                       | 119.4 <sup>g</sup>                      | 96, 120, 214, 0.148<br>264, 696, 1091 (0.123)    |
| CRu <sup>+</sup> (SS) | <sup>2</sup> A'' <sub>b</sub> | 2.468     | 1.603 | 1.929 <sup>f</sup>                        | 113.1 <sup>e</sup>                       | 104.5 <sup>g</sup>                      | 14, 78, 151, 0.294<br>231, 644, 1128 (0.243)     |



|                    |                               |       |       |                    |                    |                    |                       |         |
|--------------------|-------------------------------|-------|-------|--------------------|--------------------|--------------------|-----------------------|---------|
| TS <sub>RuS</sub>  | <sup>6</sup> A'               | 2.492 | 1.697 | 1.957 <sup>f</sup> | 128.7 <sup>e</sup> | 61.9 <sup>e</sup>  | 78, 101, 149, 1.700   |         |
|                    |                               |       |       |                    | 89.5 <sup>g</sup>  | 79.9 <sup>g</sup>  | 216, 641, 913         | (1.803) |
|                    | <sup>4</sup> A''              | 3.301 | 1.712 | 1.706 <sup>c</sup> | 53.6 <sup>e</sup>  | 143.7 <sup>e</sup> | -117, 216, 273, 0.466 |         |
|                    |                               |       |       | 1.995 <sup>f</sup> | 91.9 <sup>g</sup>  | 70.8 <sup>g</sup>  | 499, 563, 978         | (0.283) |
| RuCSS <sup>+</sup> | <sup>2</sup> A'               | 3.165 | 1.706 | 1.725 <sup>c</sup> | 56.6 <sup>e</sup>  | 140.1 <sup>e</sup> | -119, 193, 262, 0.570 |         |
|                    |                               |       |       | 2.006 <sup>f</sup> | 89.9 <sup>g</sup>  | 73.3 <sup>g</sup>  | 496, 568, 1006        | (0.405) |
|                    | <sup>2</sup> A''              | 3.245 | 1.691 | 1.706 <sup>c</sup> | 54.4 <sup>e</sup>  | 143.5 <sup>e</sup> | -119, 224, 272, 0.715 |         |
|                    |                               |       |       | 2.005 <sup>f</sup> | 90.6 <sup>g</sup>  | 71.5 <sup>g</sup>  | 491, 565, 1058        | (0.624) |
| RuS <sup>+</sup>   | <sup>6</sup> A                | 2.539 | 1.830 | 1.775 <sup>c</sup> | 72.7 <sup>e</sup>  | 112.9 <sup>e</sup> | -695, 126, 129, 1.725 |         |
|                    |                               |       |       | 2.024 <sup>f</sup> | 88.3 <sup>g</sup>  | 81.5 <sup>g</sup>  | 508, 603, 657         | (1.710) |
|                    | <sup>4</sup> A''              |       | 1.708 | 1.689 <sup>c</sup> | 102.4 <sup>g</sup> | 179.8 <sup>e</sup> | 72, 228, 316, 0.340   |         |
|                    |                               |       |       | 1.978 <sup>f</sup> |                    |                    | 422, 534, 1029        | (0.115) |
| + CS               | <sup>2</sup> A'               |       | 1.700 | 1.695 <sup>c</sup> | 99.7 <sup>g</sup>  | 179.2 <sup>e</sup> | 74, 242, 314, 0.427   |         |
|                    |                               |       |       | 1.995 <sup>f</sup> |                    |                    | 417, 517, 1072        | (0.202) |
|                    | <sup>2</sup> A''              |       | 1.684 | 1.697 <sup>c</sup> | 103.1 <sup>g</sup> | 179.3 <sup>e</sup> | 76, 235, 322, 0.570   |         |
|                    |                               |       |       | 1.980 <sup>f</sup> |                    |                    | 432, 528, 1071        | (0.418) |
| RuCS <sup>+</sup>  | <sup>6</sup> A'               |       | 1.851 | 1.616 <sup>c</sup> | 110.0 <sup>g</sup> | 166.0 <sup>e</sup> | 55, 253, 309, 1.324   |         |
|                    |                               |       |       | 2.041 <sup>f</sup> |                    |                    | 378, 384, 1090        | (1.140) |
| + S                | <sup>6</sup> Σ <sup>+</sup> + | 2.121 |       |                    |                    |                    | 466                   | 1.169   |
|                    | <sup>1</sup> Σ <sup>+</sup>   |       |       | 1.532 <sup>c</sup> |                    |                    | + 1311                | (1.377) |
| + S <sub>2</sub>   | <sup>4</sup> Σ <sup>-</sup> + |       | 1.878 | 1.517 <sup>c</sup> |                    | 180.0 <sup>e</sup> | 270 (2), 377, 1.293   |         |
|                    | <sup>3</sup> P                |       |       |                    |                    |                    | 1417                  | (1.425) |
| + S <sub>2</sub>   | <sup>2</sup> Δ +              |       | 1.590 |                    |                    |                    | 1156                  | 1.260   |
|                    | <sup>3</sup> Σ <sup>-</sup>   |       |       | 1.904 <sup>f</sup> |                    |                    | + 715                 | (1.290) |

<sup>a</sup> All geometrical parameters are calculated at the B3LYP/Def2TZVPP level of theory. <sup>b</sup> Relative energies calculated at CCSD(T)/Def2TZVPP//B3LYP/Def2TZVPP (B3LYP/Def2TZVPP) levels of theory, corrected for zero point energies. Absolute calculated energies for the ground state Ru<sup>+</sup> + CS<sub>2</sub> asymptote are 927.832727 (929.112010) E<sub>h</sub>, including zero point energies. <sup>c</sup> r(C-S). <sup>d</sup> ∠RuSC and ∠SCS. <sup>e</sup> ∠SRuC and ∠RuCS. <sup>f</sup> r(S-S). <sup>g</sup> ∠CSS and ∠RuSS.
